# Supplementary material
Source: Springer Nature journal article supplement (https://www.springermedizin.de/resource/supplementary/12936_2010_1343_MOESM5_ESM.pdf/9549564)

### A - Female *Anopheles gambiae* s.l.

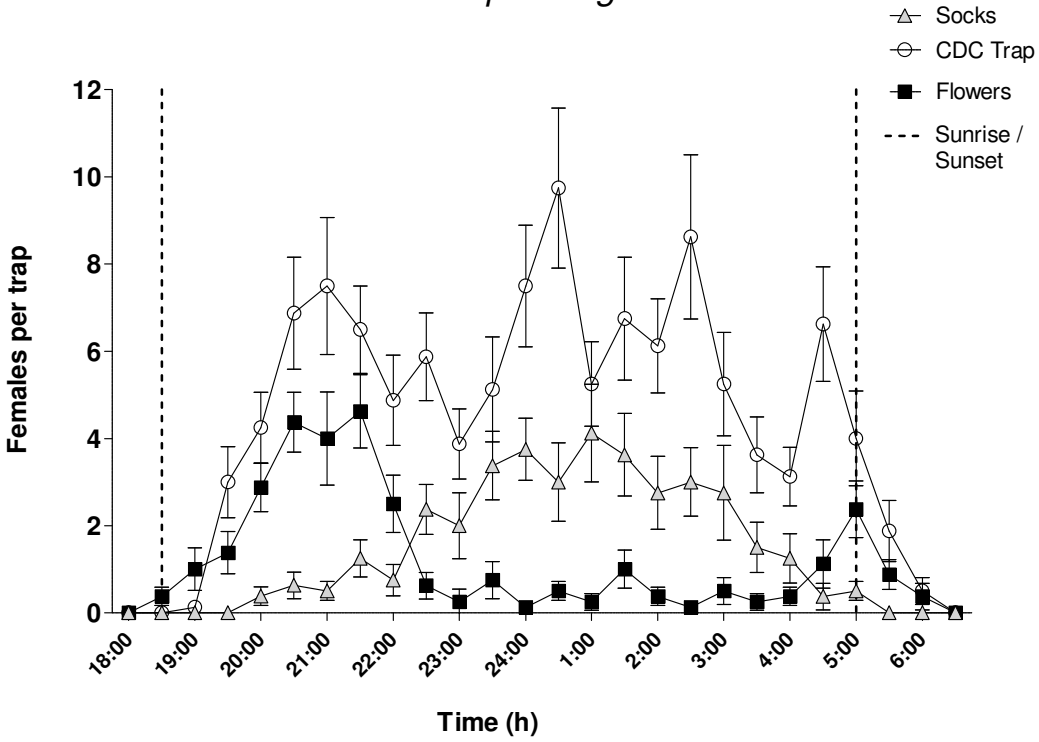

### B - Male *Anopheles gambiae* s.l.

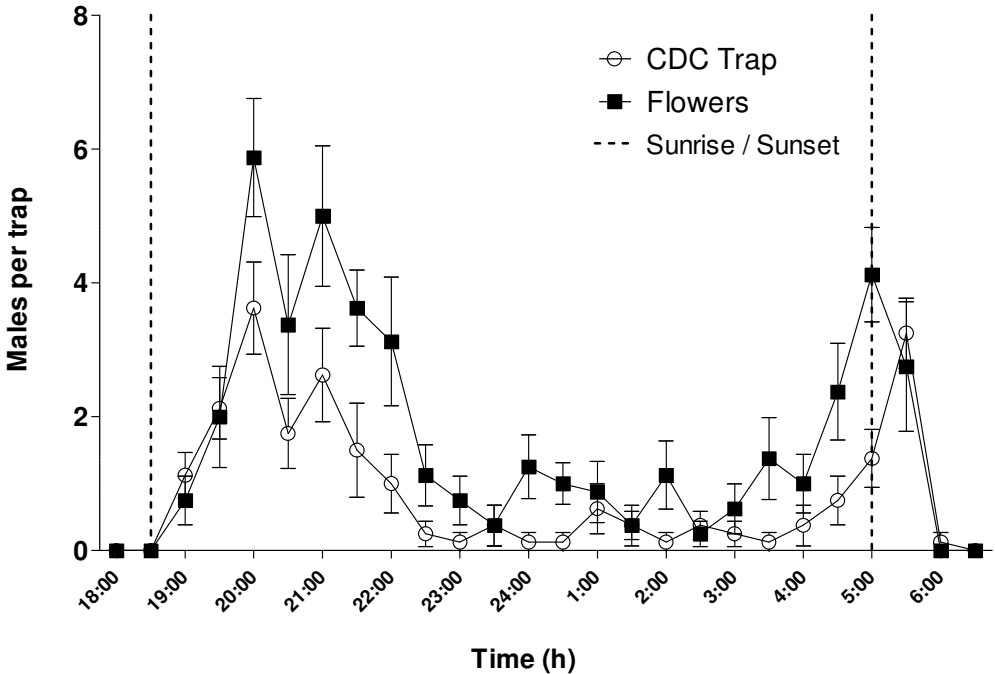

Supplement: MOESM5 [file 9549564]
